# Supplementary material for: Graphene-crosslinked polyurethane block copolymer nanocomposites with enhanced mechanical, electrical, and shape memory properties
Source: Royal Society of Chemistry journal article supplement (doi:10.1039/c3ra40711j), 2013-01-01
Supplement: c3ra40711j.pdf [file c3ra40711j.pdf]

## Electronic Supplementary Material

### Graphene-crosslinked polyurethane block copolymer nanocomposite with enhanced mechanical, electrical, and shape memory properties

Sravendra Rana<sup>ab</sup>, Jae Whan Cho<sup>\*a</sup> and Lay Poh Tan<sup>\*b</sup>

<sup>a</sup>Department of Textile Engineering, Konkuk University, Seoul 143-701, Republic of Korea. E-mail: [jwcho@konkuk.ac.kr](mailto:jwcho@konkuk.ac.kr)

<sup>b</sup>School of Materials Science and Engineering, Nanyang Technological University, 50 Nanyang Avenue, Singapore 639798, Singapore. E-mail: [lpTan@ntu.edu.sg](mailto:lpTan@ntu.edu.sg)

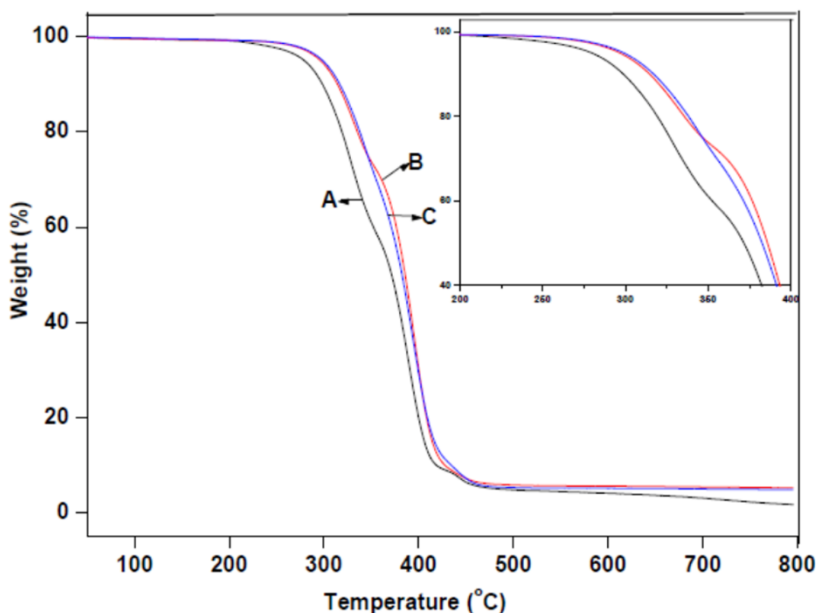

**Fig. S1** TGA thermograms of pristine PU and crosslinked composites.

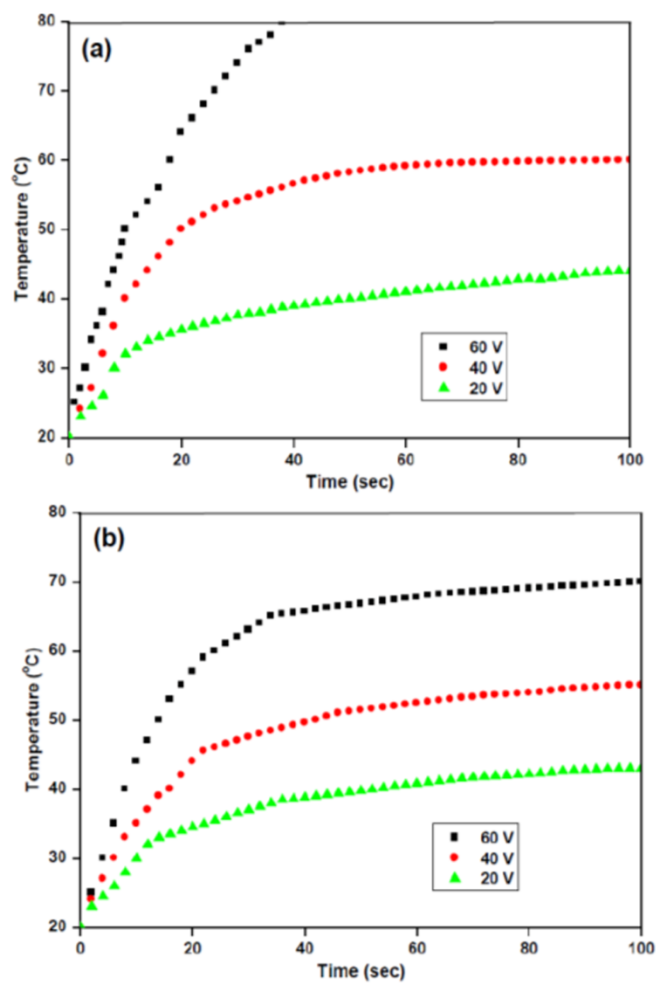

**Fig. S2** Surface temperature change of (a) graphene-crosslinked composite and (b) CNT-crosslinked composite.
